# Supplementary material
Source: ML conference proceedings conference paper supplement (https://openaccess.thecvf.com/content/cvpr_2017/html/Buch_SST_Single-Stream_Temporal_2017_CVPR_paper.html)
Supplement: Supplementary file 1 [file Buch_SST_Single-Stream_Temporal_2017_CVPR_supplemental.pdf]

Archive with 2 entries (1 files):
- 1063-supp/
- 1063-supp/README
