# Supplementary material
Source: ML conference proceedings conference paper supplement (https://openaccess.thecvf.com/content/cvpr_2017/html/Buch_SST_Single-Stream_Temporal_2017_CVPR_paper.html)
Supplement: Supplementary file 1 [file Buch_SST_Single-Stream_Temporal_2017_CVPR_supplemental.pdf › 1063-supp/README]

SST: Single-Stream Temporal Action Proposals


For supplementary material, please visit https://github.com/shyamal-b/sst/
